# Supplementary material
Source: PubMed Central journal article supplement (PMC3156313)
Supplement: NIHMS304437-supplement-1.pdf [file NIHMS304437-supplement-1.pdf]

**Table 1 Selective activation of AR-ir cells** (greater than general activation in same area)

| p-values for: | <b>MeA<sub>total</sub></b> | <b>MeAd</b>              | <b>MeAv</b>               | <b>MeP<sub>total</sub></b> | <b>MePd</b>               | <b>MePv</b>              |
|---------------|----------------------------|--------------------------|---------------------------|----------------------------|---------------------------|--------------------------|
| Main Effect   | F(1,63)=29.92,<br>p<0.001  | F(1,63)=6.77,<br>p=0.015 | F(1,63)=40.97,<br>p<0.001 | F(1,63)= 27.83,<br>p<0.001 | F(1,63)=19.78,<br>p<0.001 | F(1,63)=5.99,<br>p=0.021 |
| HVF           | =0.005                     | ns                       | <0.001                    | <0.05                      | <0.05                     | <0.05                    |
| fFGS          | <0.001                     | =0.004                   | =0.001                    | =0.002                     | =0.007                    | =0.003                   |
| mFGS          | <0.01                      | ns                       | =0.002                    | ns                         | <0.05                     | ns                       |
| MMU           | ns                         | ns                       | ns                        | <0.05                      | ns                        | <0.02                    |

**Supplementary Table 1:** p-values for 2-way RM ANOVA for numbers of activated AR-ir cells compared with numbers of all activated cells, with different stimuli (Fisher LSD post-hoc analysis) and across medial amygdala subregions (Fisher LSD post-hoc analysis). ns= not significant.
